# Supplementary material for: Tapinarof Cream 1% Once Daily for the Treatment of Plaque Psoriasis: Case Photography of Clinical Outcomes from Three Phase 3 Trials
Source: Springer Nature journal article supplement (doi:10.1007/s13555-023-01008-9), 2023-09-11
Supplement: MOESM1 [file 26028696]

## **Supplementary Material**

### **Tapinarof Cream 1% Once Daily for the Treatment of Plaque Psoriasis: Case Photography of Clinical Outcomes from Three Phase 3 Trials**

Seemal R. Desai,<sup>1,2</sup> Linda Stein Gold,<sup>3</sup> Michael C. Cameron,<sup>4,5</sup> Alexandra Golant,<sup>5</sup> G. Michael Lewitt,<sup>6</sup> Matthew J. Bruno,<sup>7</sup> George Martin,<sup>8</sup> Philip M. Brown,<sup>9</sup> David S. Rubenstein,<sup>9</sup> Victoria Butners,<sup>9</sup> Anna M. Tallman<sup>9</sup>

#### **Affiliations:**

<sup>1</sup>Department of Dermatology, The University of Texas Southwestern Medical Center, Dallas, TX, USA;

<sup>2</sup>Innovative Dermatology, Plano, TX, USA;

<sup>3</sup>Henry Ford Health System, Detroit, MI, USA;

<sup>4</sup>Cameron Dermatology, New York, NY, USA

<sup>5</sup>Icahn School of Medicine at Mount Sinai, New York, NY, USA;

<sup>6</sup>Illinois Dermatology Institute, Chicago, IL, USA;

<sup>7</sup>Dermatology & Skin Cancer Surgery Center, Allen, TX, USA;

<sup>8</sup>George Martin Dermatology Associates, Kihei, HI, USA;

<sup>9</sup>Dermavant Sciences, Inc., Morrisville, NC, USA

#### **Author for correspondence:**

Seemal R. Desai, MD, FAAD

[seemald@yahoo.com](mailto:seemald@yahoo.com)

## Supplementary Figure S1. PSOARING 3 Trial Design

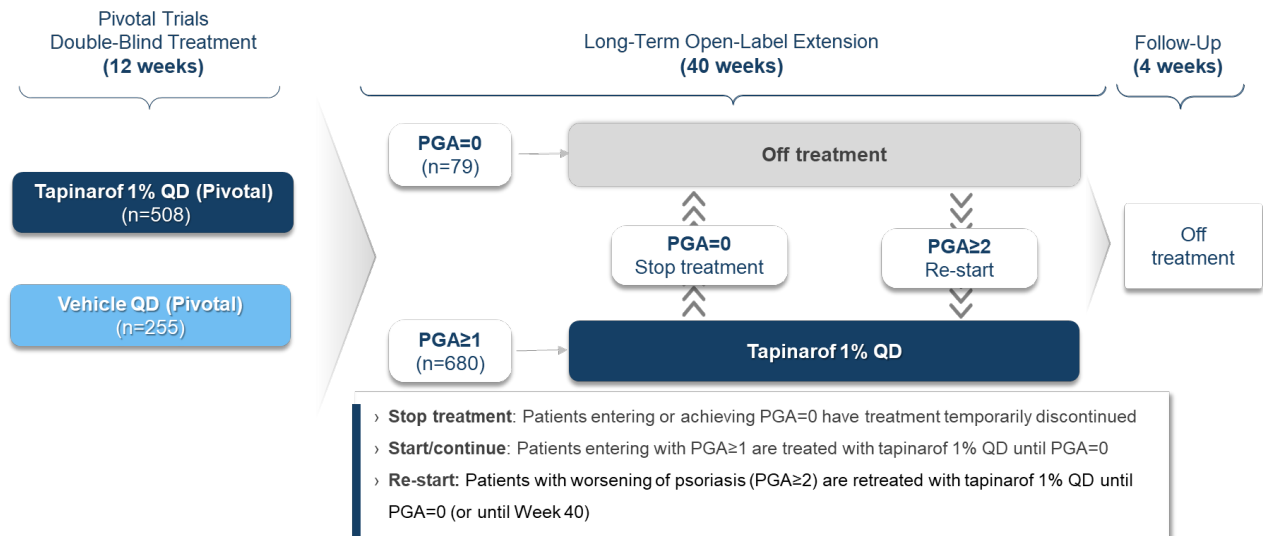

PGA, Physician Global Assessment; QD, once daily.
